# Supplementary material
Source: PubMed Central journal article supplement (PMC3533229)

**Supplemental Figure 1:** *Characterization of cultured microvascular endothelial cells derived from the lung and heart. Panel A*, representative phase contrast image of LMVEC and HMVEC cultures viewed at 200X magnification. Scale bars = 250 $\mu$ m. Representative fluorescent images of endothelial cells immunofluorescently stained for vWF (*panel B*), VE-cadherin (*panel C*), or for internalization of acetylated LDL (*panel D*) viewed at 1000X magnification. Nuclei were counterstained with DAPI. Scale bars = 20 $\mu$ m.

**Supplemental Figure 2:** *H<sub>2</sub>O<sub>2</sub>-induced Akt activation is delayed in HMVEC relative to LMVEC. Panel A*, equivalent amounts of LMVEC, grown in serum-reduced medium, were exposed to 0.5mM H<sub>2</sub>O<sub>2</sub> for indicated time. Equivalent amounts of lysates were resolved by SDS-PAGE and immunoblotted for phosphorylated Akt (S<sup>473</sup>). The membranes were stripped and reprobed for total Akt. Representative immunoblots are shown, n = 3 - 6.

# Supplemental Figure 1

**A**

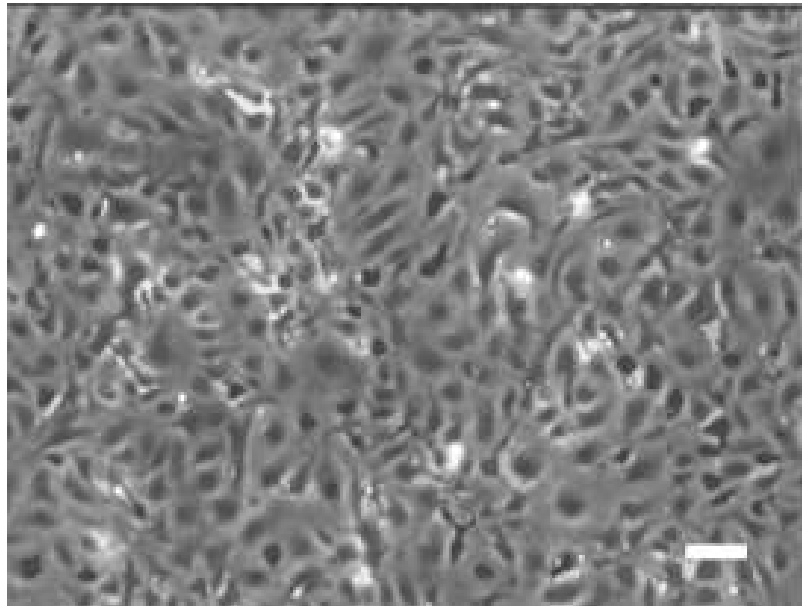

**LMVEC**

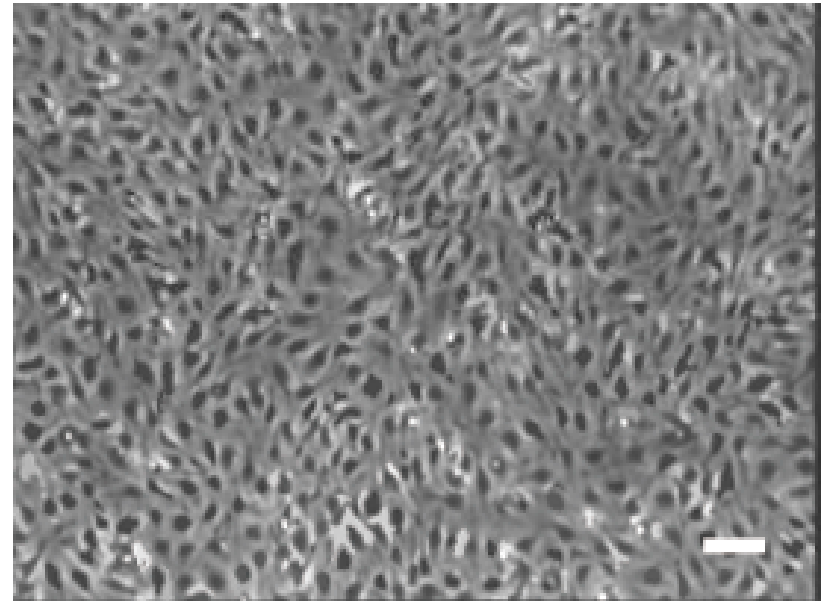

**HMVEC**

# Supplemental Figure 1

**B**

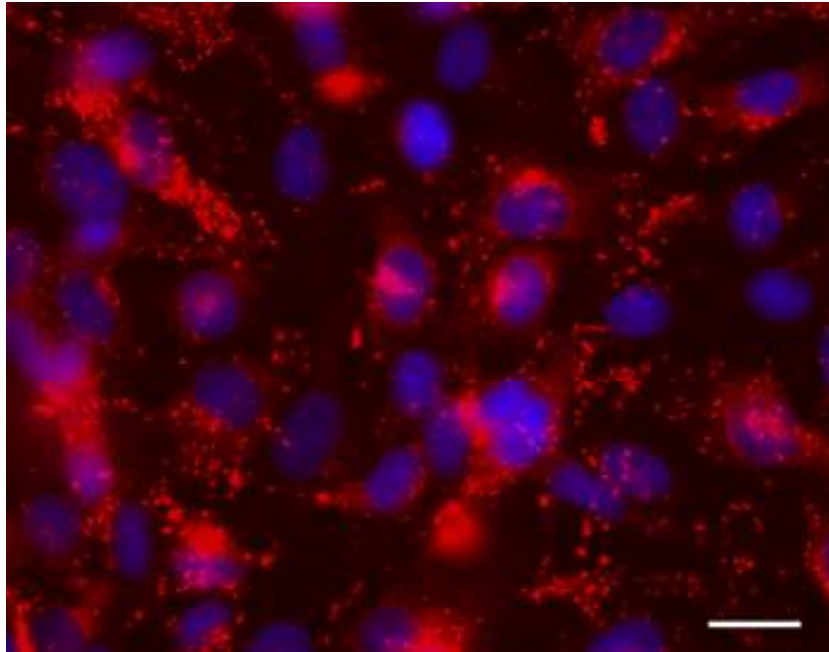

**LMVEC**

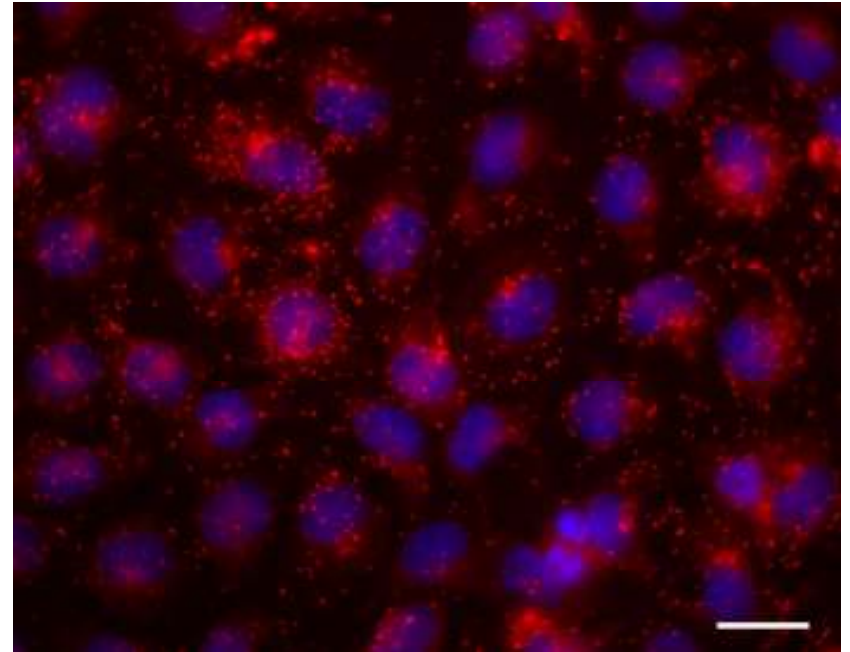

**HMVEC**

# Supplemental Figure 1

**C**

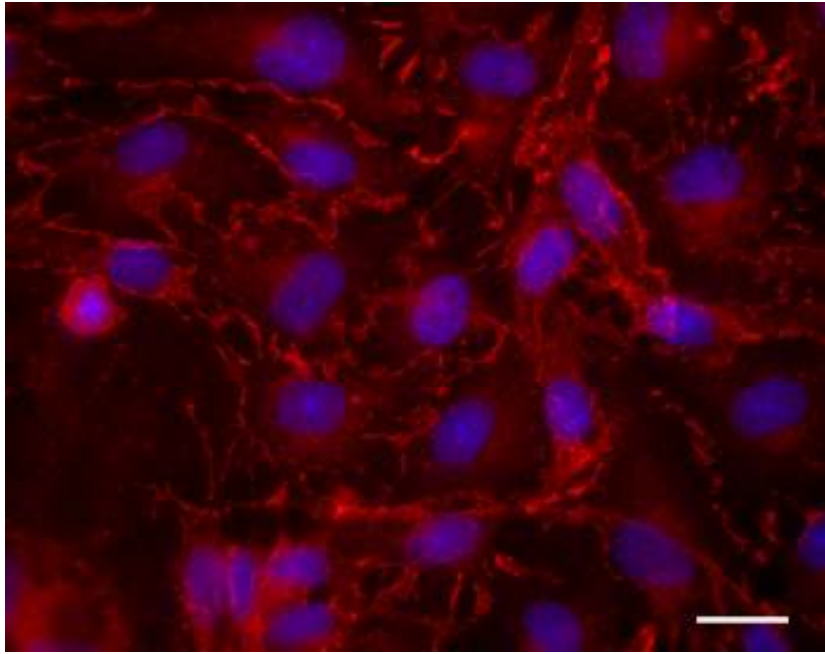

**LMVEC**

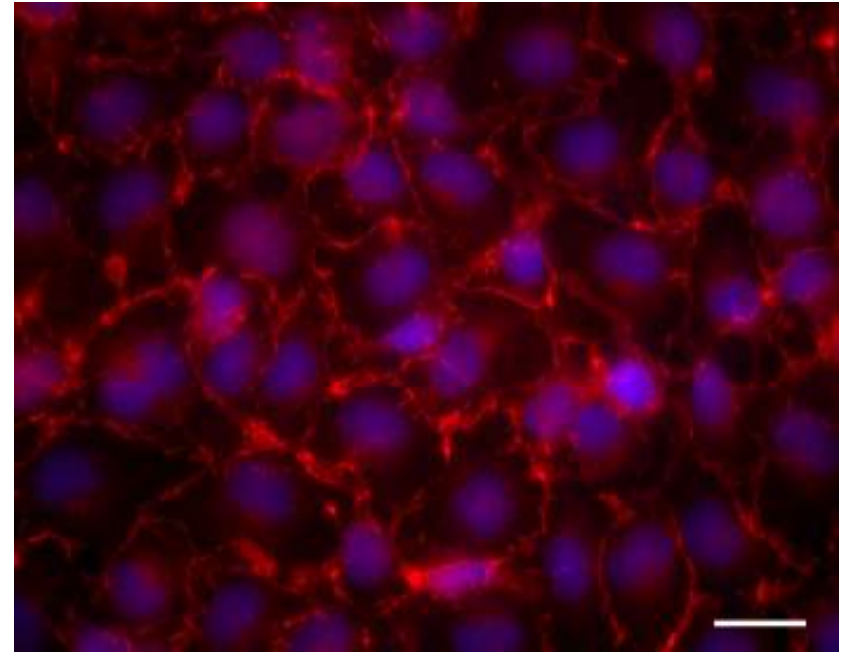

**HMVEC**

# Supplemental Figure 1

**D**

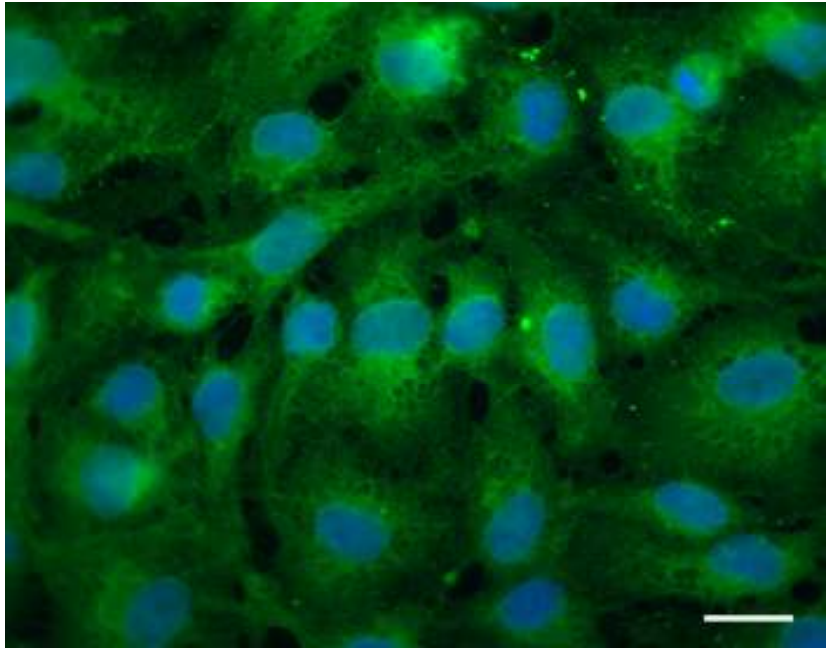

**LMVEC**

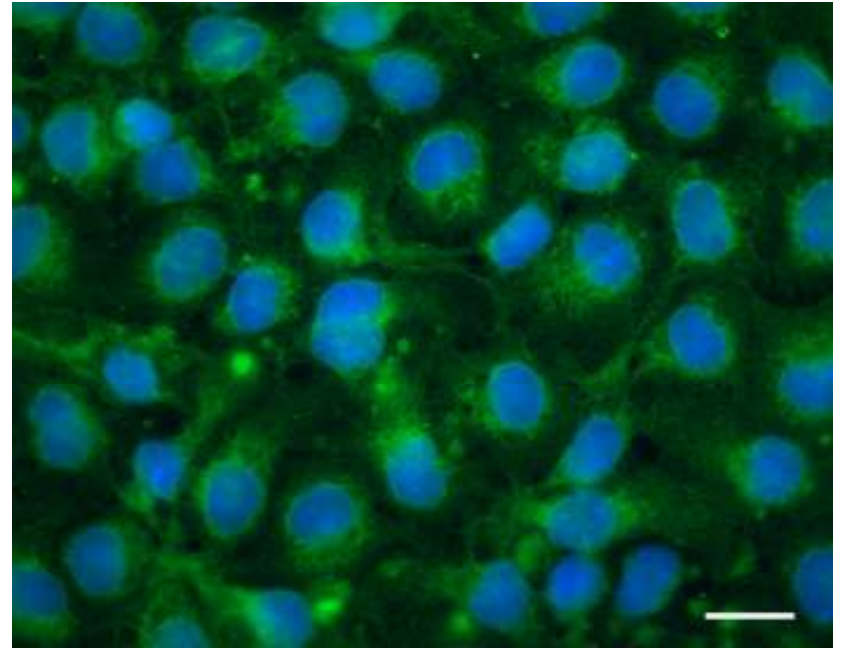

**HMVEC**

# Supplemental Figure 2

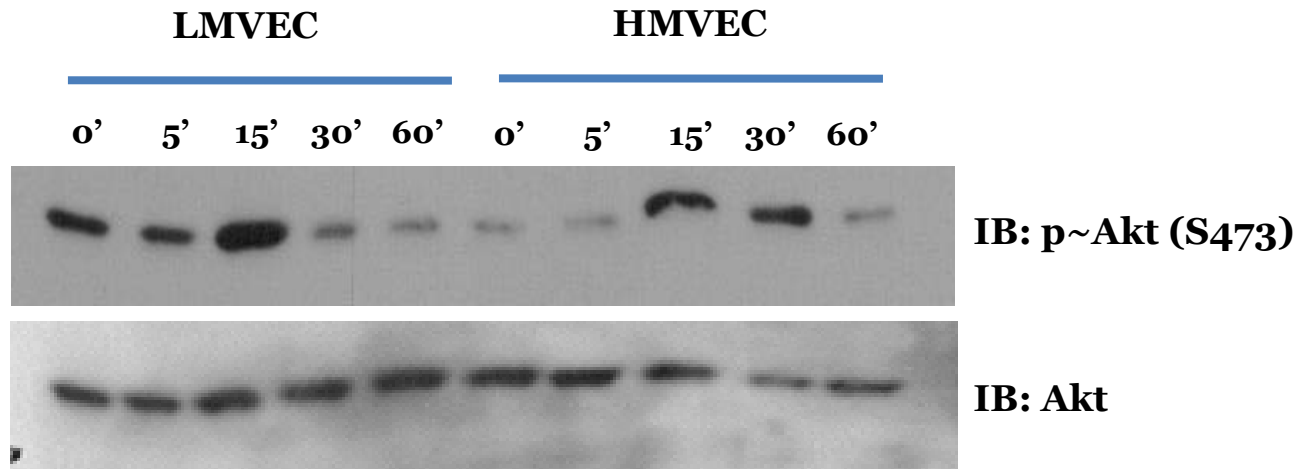

Supplement: NIHMS428954-supplement-01.pdf [file NIHMS428954-supplement-01.pdf]
